## Comparison of Leucocyte Telomere Length, Atherosclerotic Cardiovascular disease risk and the output of a Deep learning Cardiac BioAge risk prediction tool: A UK Biobank Cohort study

Ehsan Vaghefi PhD<sup>1,3\*</sup>, Songyang An MSc<sup>1,3</sup>, Rini Corbett BSc<sup>3</sup>, David Squirrell FRANZCO<sup>2,3</sup>

1. Department of Optometry and Ophthalmology, University of Auckland, New Zealand
2. Department of Ophthalmology, Greenlane Clinical Centre, Auckland District Health Board, Auckland
3. Toku Eyes, Auckland, New Zealand

"The authors have withdrawn their manuscript owing to major updates that will be made prior to resubmission.

Therefore, the authors do not wish this work to be cited as reference for the project. If you have any questions, please contact the corresponding author."
